# Supplementary material for: Phosphorylation and activation of ubiquitin-specific protease-14 by Akt regulates the ubiquitin-proteasome system
Source: eLife journal article supplement (doi:10.7554/elife.10510), 2015-11-02
Supplement: supp [file elife-10510-supp-v1.zip]

Archive with 8 entries (8 files):
- elife_poa_e10510_Figure_3_figure_supplement_2.pdf
- elife_poa_e10510_Figure_2_figure_supplement_1.pdf
- elife_poa_e10510_Figure_5_figure_supplement_2.pdf
- elife_poa_e10510_Figure_6_figure_supplement_1.pdf
- elife_poa_e10510_Figure_5_figure_supplement_1.pdf
- elife_poa_e10510_Figure_1_figure_supplement_1.pdf
- elife_poa_e10510_Figure_3_figure_supplement_1.pdf
- elife_poa_e10510_Figure_4_figure_supplement_1.pdf
