# Supplementary figures and images for: Phosphorylation and activation of ubiquitin-specific protease-14 by Akt regulates the ubiquitin-proteasome system
Source: eLife journal article supplement (doi:10.7554/elife.10510), 2015-11-02

Figure 3-figure supplement 2

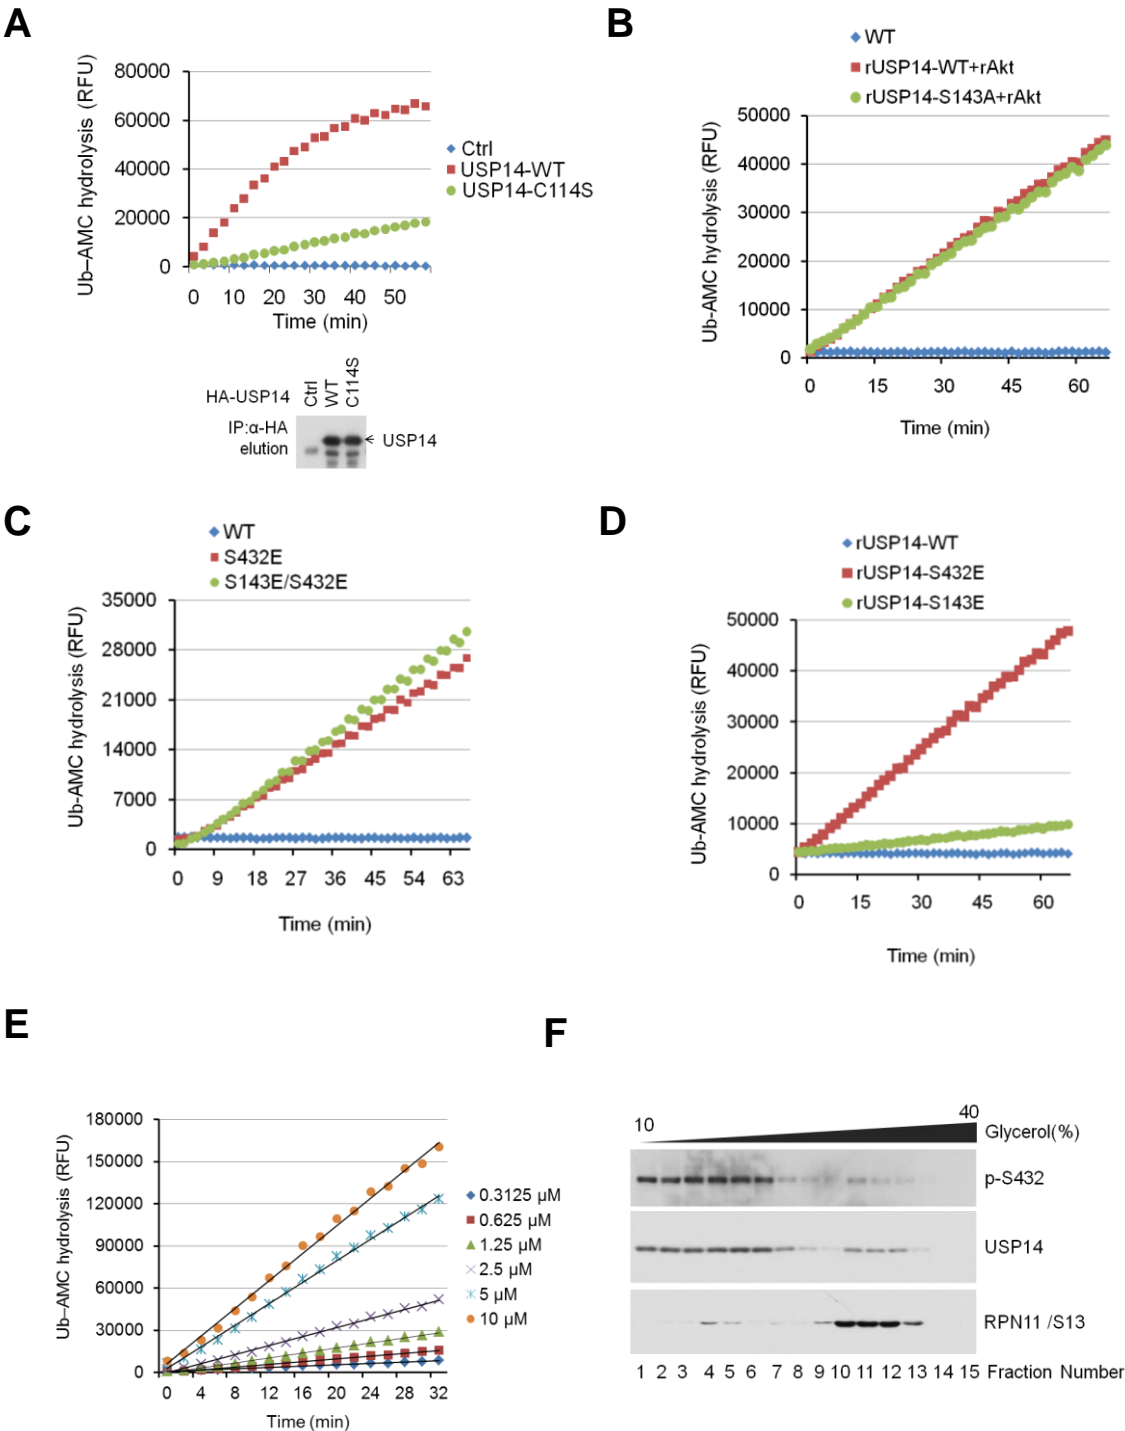

Supplement: supp [file elife-10510-supp-v1.zip › elife_poa_e10510_Figure_3_figure_supplement_2.pdf]

Figure 2-figure supplement 1

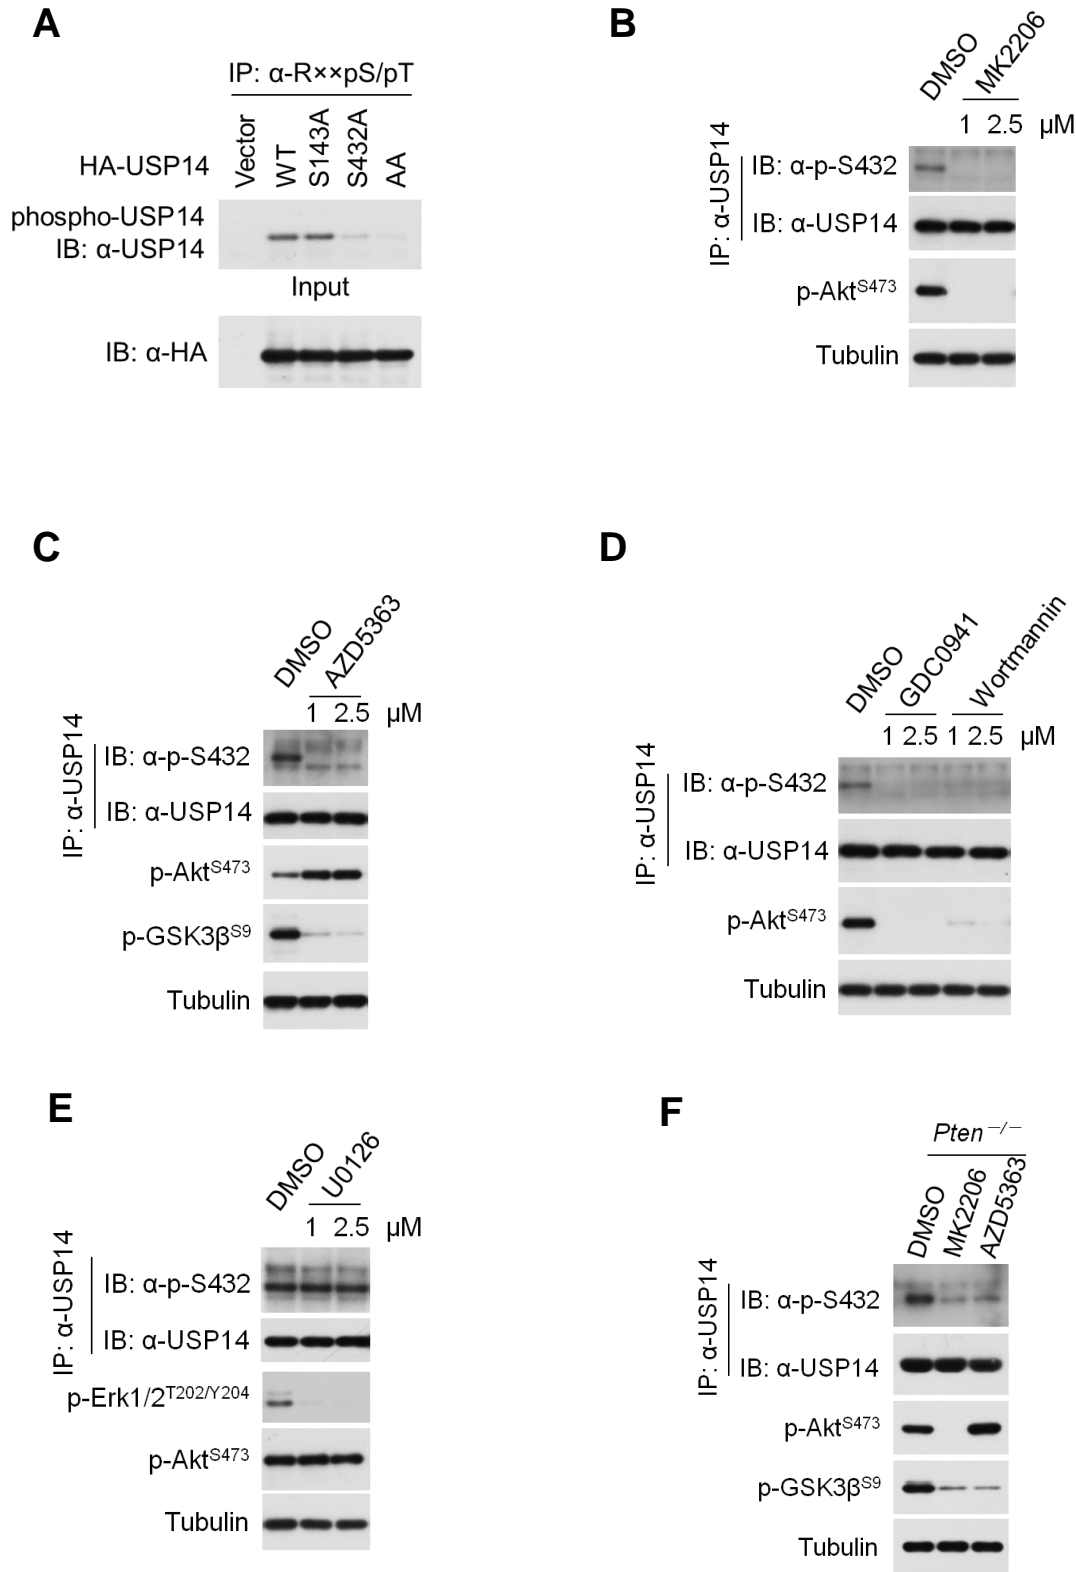

Supplement: supp [file elife-10510-supp-v1.zip › elife_poa_e10510_Figure_2_figure_supplement_1.pdf]

Figure 5-figure supplement 2

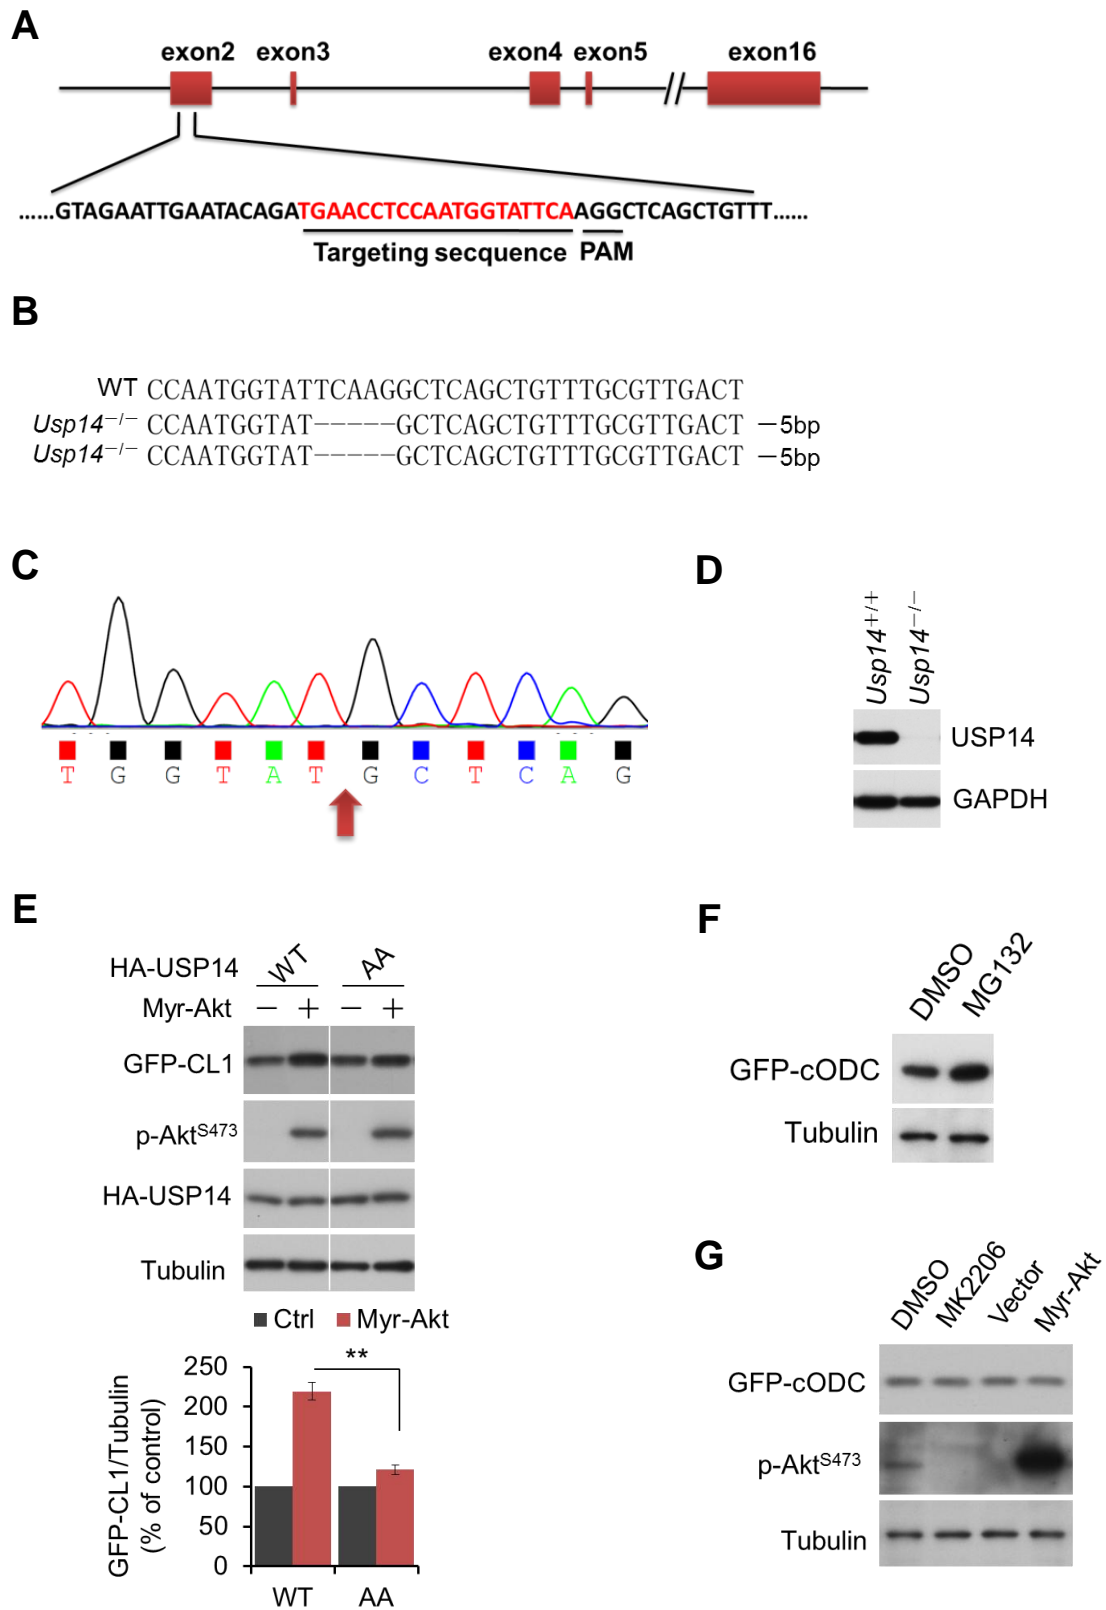

Supplement: supp [file elife-10510-supp-v1.zip › elife_poa_e10510_Figure_5_figure_supplement_2.pdf]

Figure 6-figure supplement 1

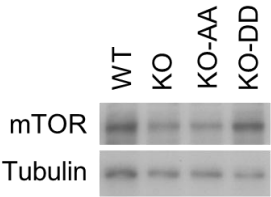

Supplement: supp [file elife-10510-supp-v1.zip › elife_poa_e10510_Figure_6_figure_supplement_1.pdf]

Figure 5-figure supplement 1

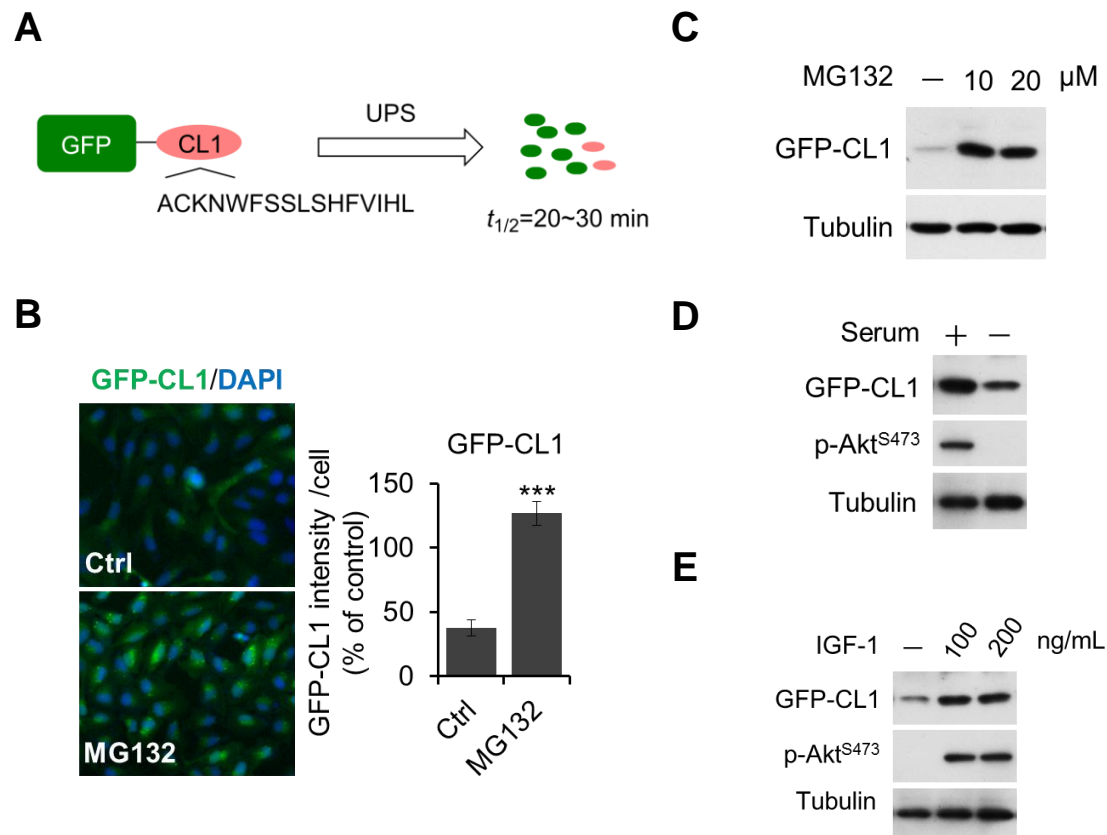

Supplement: supp [file elife-10510-supp-v1.zip › elife_poa_e10510_Figure_5_figure_supplement_1.pdf]

Figure 1-figure supplement 1

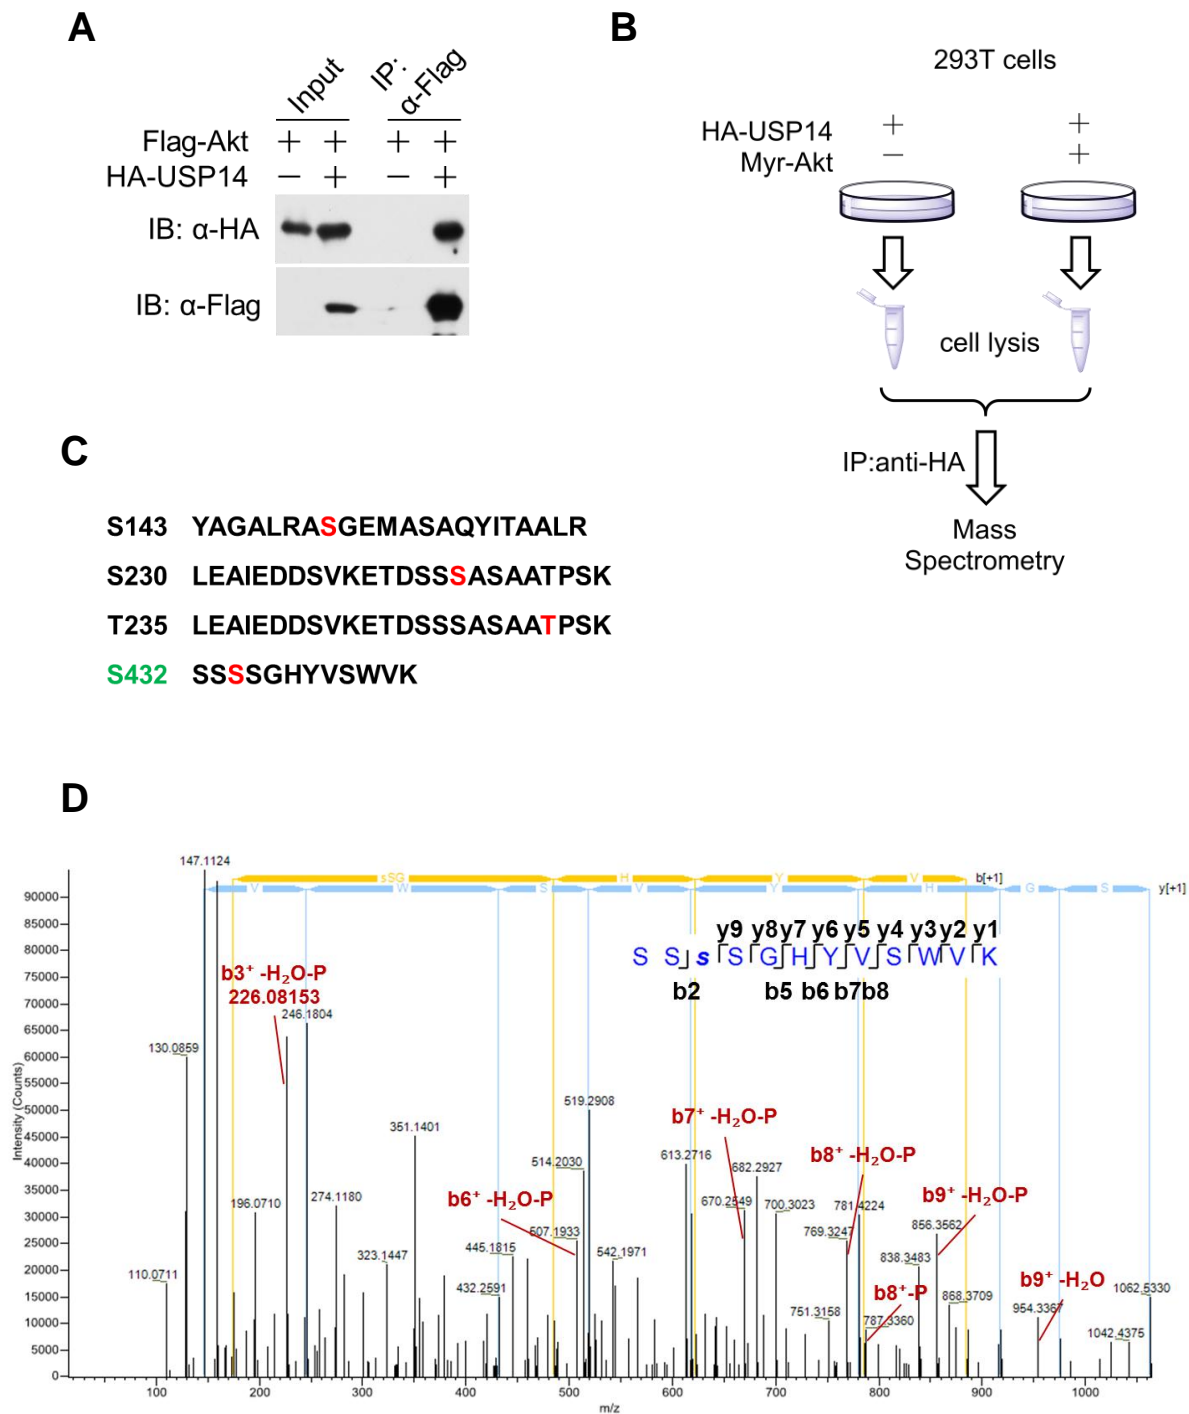

Supplement: supp [file elife-10510-supp-v1.zip › elife_poa_e10510_Figure_1_figure_supplement_1.pdf]

Figure 3-figure supplement 1

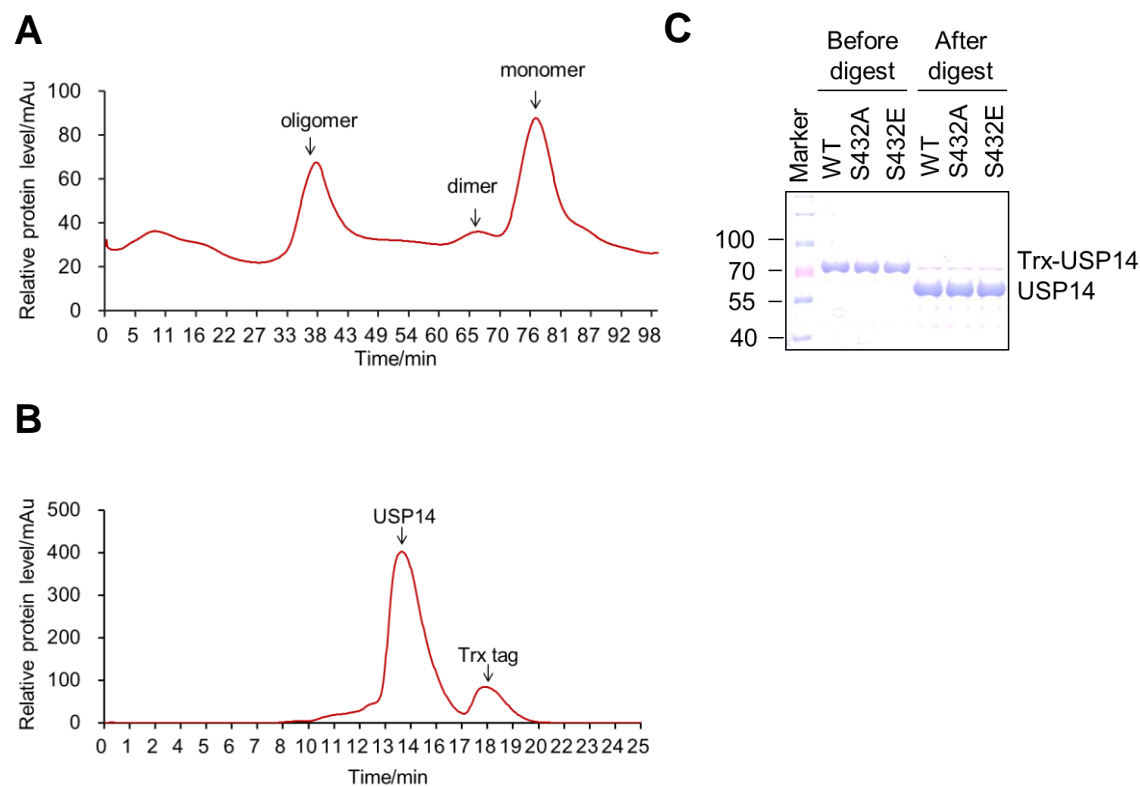

Supplement: supp [file elife-10510-supp-v1.zip › elife_poa_e10510_Figure_3_figure_supplement_1.pdf]

Figure 4-figure supplement 1

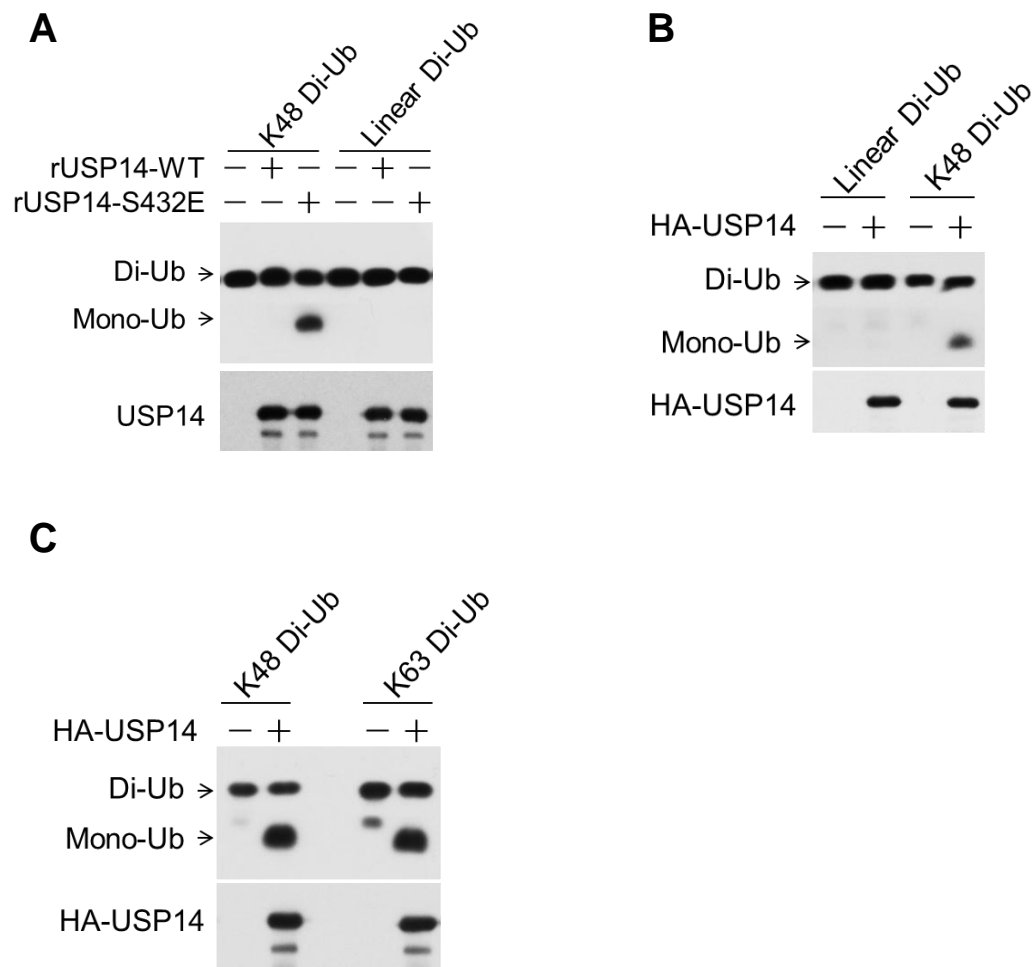

Supplement: supp [file elife-10510-supp-v1.zip › elife_poa_e10510_Figure_4_figure_supplement_1.pdf]
